# Supplementary material for: A multi-responsive Tb-doped MOF probe for highly specific breath volatile biomarker recognition of lung cancer
Source: Royal Society of Chemistry journal article supplement (doi:10.1039/d2tc05140k), 2023-01-01
Supplement: d2tc05140k1.pdf [file d2tc05140k1.pdf]

## Supporting Information

### **A Multi-responsive Tb-doped MOF Probe for Highly Specific Breath Volatile Biomarkers Recognition of Lung Cancer**

Luping Liu<sup>a</sup>, Lihua Ru<sup>a</sup>, Hanxiao Tang<sup>b</sup>, Zhijuan Zhang<sup>\*a,c</sup>, Weisheng Feng<sup>a</sup>

a. College of Pharmacy, Henan University of Chinese Medicine, Zhengzhou 450046, China

b. College of Chinese Medical Sciences, Henan University of Chinese Medicine, Zhengzhou 450046, China

c. Institute of Mass Spectrometer and Atmospheric Environment, Jinan University, Guangzhou 510632, China

Corresponding author: Zhijuan Zhang, Email: [zhangyan0204@126.com](mailto:zhangyan0204@126.com) (Z. J. Zhang).

## **1. Materials**

## **2. Methods**

## **3. Synthesis of Tb-UiO-66**

## **4. Chemical stability Tb-UiO-66**

## **5. Thermogravimetric analysis**

## **6. SEM-EDS and XPS Characterization of Tb-UiO-66**

## **7. Photoluminescence properties of Tb-UiO-66**

## **8. Fluorescence sensing of styrene and EB**

## **9. Sensing mechanisms**

### **1. Materials**

*N,N'*-dimethylformamide (DMF), ethanol, styrene and ethylbenzene of the benzene compounds and the other chemicals all were purchased from J&K Scientific. All reagents and chemicals were analytical reagent and directly used without further purification. Deionized water was prepared from the Milli-Q ultrapure water system throughout all experiments. And the 70 % ethanol used in this experiment was further prepared by anhydrous ethanol by adding deionized water.

### **2. Methods**

All chemicals were purchased and directly used. The inductively coupled plasma optical emission spectrometer (ICP-OES) were measured by Agilent 5110. The powder X-ray diffraction (PXRD) patterns were obtained by Bruker D8 Advance Conventional Angle X-ray diffractometer. Scanning electron microscope (SEM) were measured by TESCAN MIRA LMS. Fourier transform infrared spectroscopy (FTIR) were obtained from Bruker TENSOR II instrument. X-ray photoelectron spectra (XPS) were recorded on a Thermo Scientific ESCALAB 250Xi instrument (Thermo Scientific, America) with a monochromatic Al K $\alpha$  X-ray source (1486.6 eV). Fluorescence lifetime was recorded on an Edinburgh FLS980 instrument by using a microsecond

lamp to scan at Ex=269 nm. Fluorescence sensing was recorded on a HITACHI F7100 spectrophotometer.

### 3. Synthesis of Tb-UiO-66

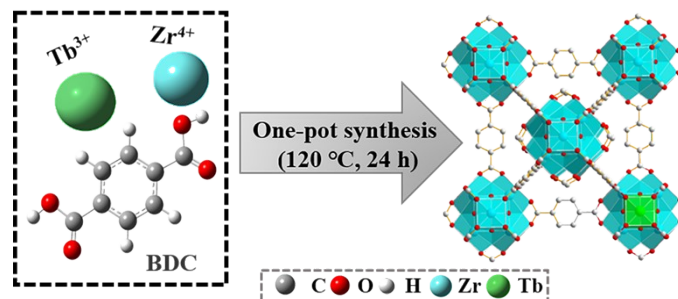

Scheme S1. Synthesis process of Tb-UiO-66.

Table S1. Mole and volume of reagent used to synthesize bimetallic materials Tb-UiO-66.

| Sample            | Metal source                |                                                                | Ligand        | Total solvent | Tb/Zr                |                         |
|-------------------|-----------------------------|----------------------------------------------------------------|---------------|---------------|----------------------|-------------------------|
|                   | ZrCl <sub>4</sub><br>(mmol) | Tb(NO <sub>3</sub> ) <sub>3</sub> •6H <sub>2</sub> O<br>(mmol) | BDC<br>(mmol) | DMF (mL)      | Theoretical<br>ratio | Real ratio<br>(ICP-OES) |
| Tb-UiO-66 (1:103) | 0.061                       | 1.159                                                          | 1.22          | 50            | 1:19                 | 1:103                   |
| Tb-UiO-66 (1:65)  | 0.122                       | 1.098                                                          | 1.22          | 50            | 1:9                  | 1:65                    |
| Tb-UiO-66 (1:17)  | 0.305                       | 0.915                                                          | 1.22          | 50            | 1:3                  | 1:17                    |
| Tb-UiO-66 (1:1.5) | 0.610                       | 0.610                                                          | 1.22          | 50            | 1:1                  | 1:1.5                   |

#### 4. Chemical stability Tb-UiO-66

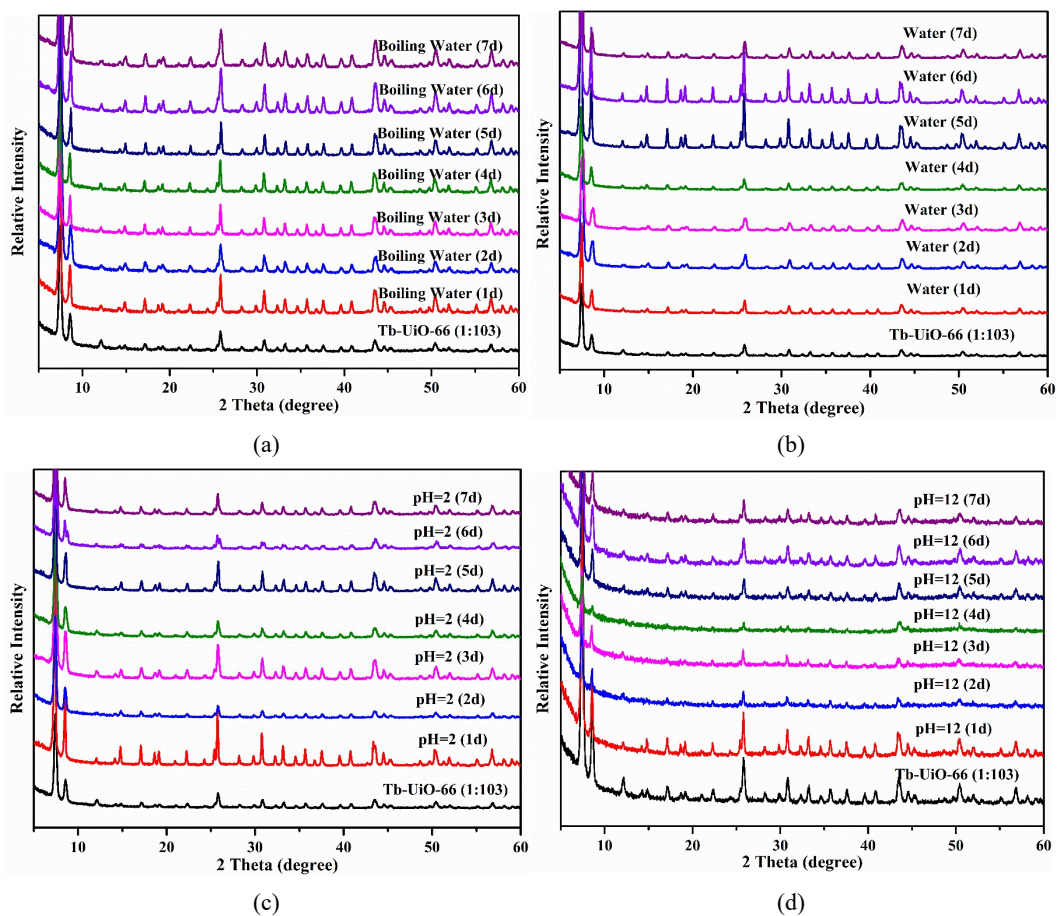

Fig. S1 PXRD patterns of Tb-UiO-66 (1:103) (a) in boiling water; (a) in ambient water; (c) in pH=2 aqueous solution at room temperature; (d) in pH=12 aqueous solution at room temperature.

Table S2. The diffraction peaks of UiO-66 and Tb-UiO-66.

| Samples           | 2 Theta (°) |      |      |
|-------------------|-------------|------|------|
|                   | 110         | 002  | 244  |
| Tb-UiO-66 (1:1.5) | 7.39        | 8.50 | 25.7 |
| Tb-UiO-66 (1:17)  | 7.43        | 8.52 | 25.7 |
| Tb-UiO-66 (1:65)  | 7.45        | 8.54 | 25.8 |
| Tb-UiO-66 (1:103) | 7.45        | 8.58 | 25.8 |
| UiO-66            | 7.48        | 8.60 | 25.8 |

## 5. Thermogravimetric analysis

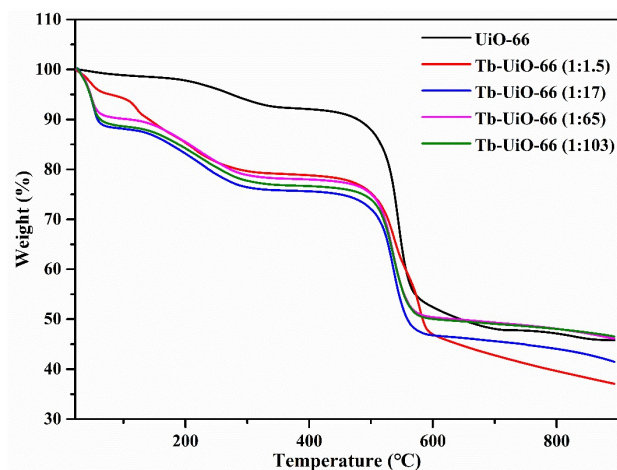

Fig. S2 Thermogravimetric analysis of UiO-66 before and after modification.

## 6. SEM-EDS and XPS Characterization of Tb-UiO-66

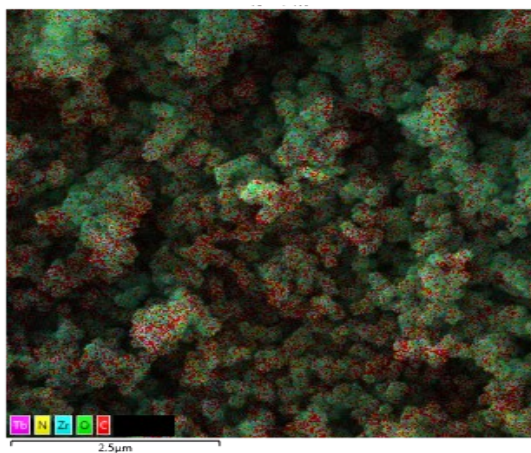

Fig. S3 SEM images of Tb-UiO-66(1:103).

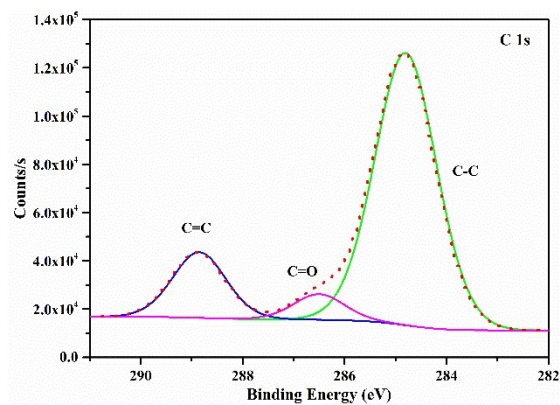

Fig. S4 XPS spectra for C 1S in Tb-UiO-66 (1:17).

Table. S3 Comparison of binding energy of Zr 3d before and after modification of UiO-66.

| Samples           | Zr 3d5/2  | Zr 3d3/2  |
|-------------------|-----------|-----------|
| UiO-66            | 185.20 eV | 182.80 eV |
| Tb-UiO-66 (1:103) | 184.95 eV | 182.60 eV |
| Tb-UiO-66 (1:17)  | 184.90 eV | 182.50 eV |

## 7. Photoluminescence properties of Tb-UiO-66

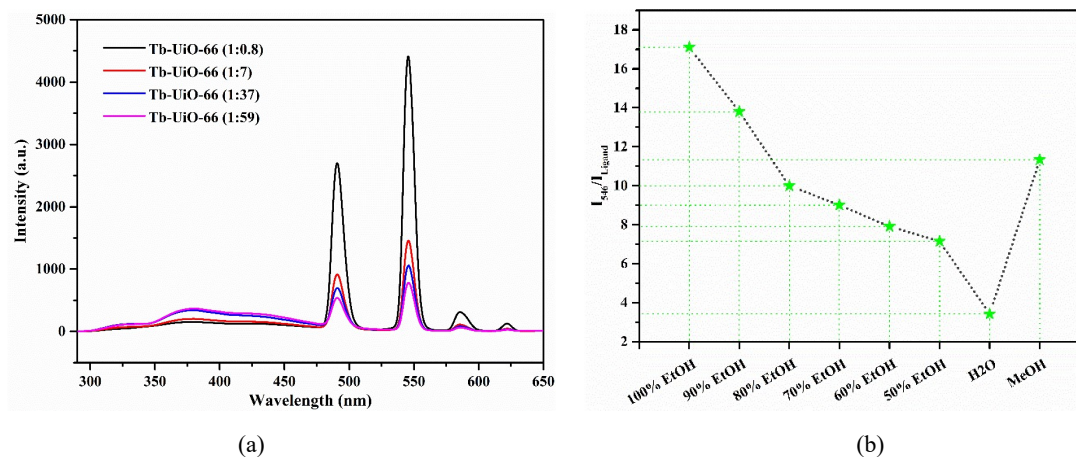

Fig. S5 Tb-UiO-66 (1:103) suspended in different hydroxyl solutions (a) Emission spectra (Ex=269 nm); (b) Trend graph of relative fluorescence intensity.

## 8. Fluorescence sensing of styrene and EB

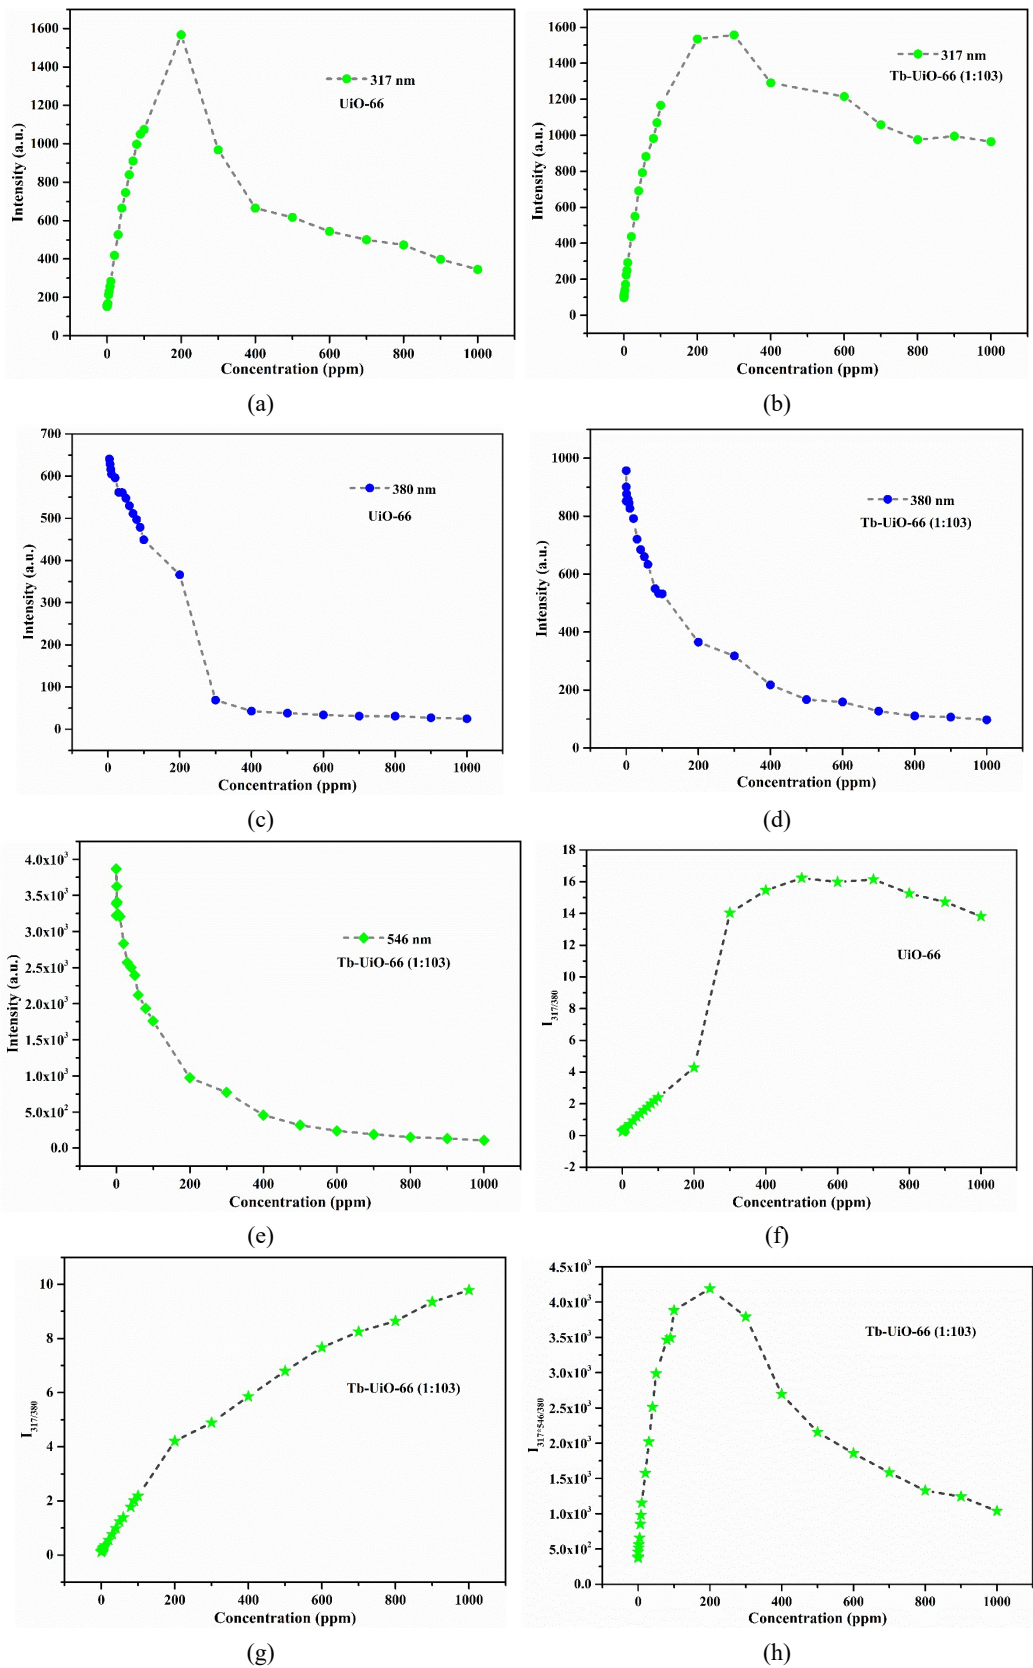

Fig. S6 (a~e) Trend diagram between styrene concentration and fluorescence intensity of UiO-66 and Tb-UiO-66 (1:103) at different emission wavelength; (f~h) Trend diagram between styrene concentration and relative fluorescence intensity of UiO-66 and Tb-UiO-66 (1:103).

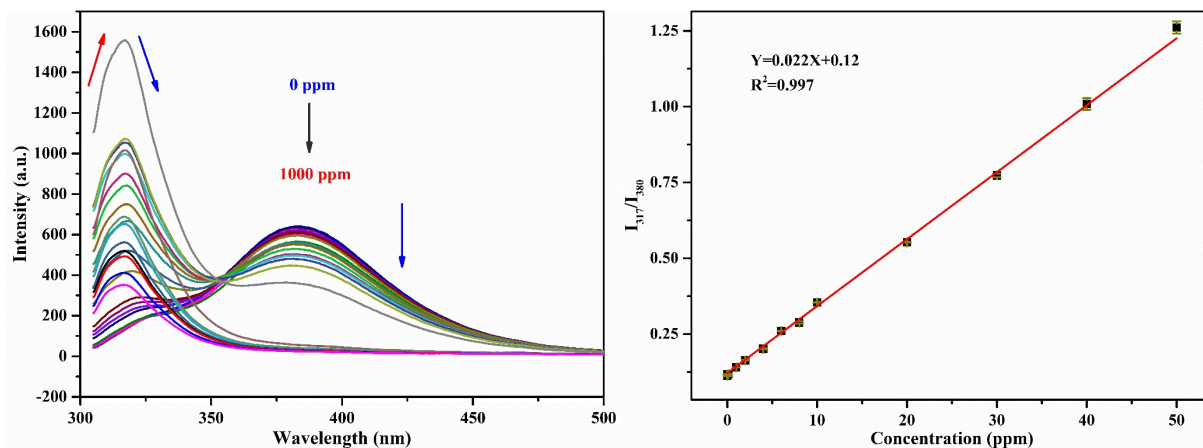

(a) (b)

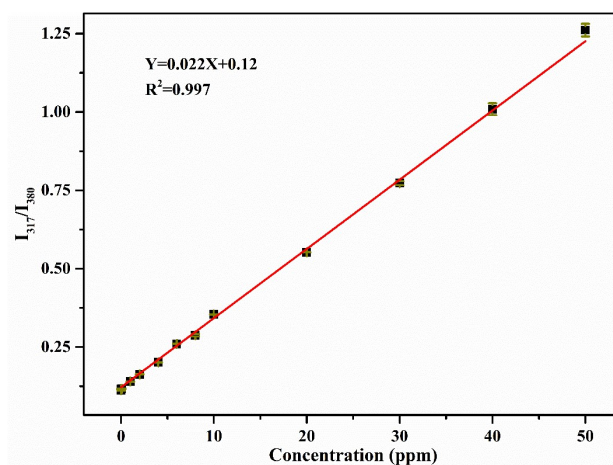

(c)

Fig. S7 Titration results of styrene (a) fluorescence spectrum of UiO-66 ( $\lambda_{ex}=285$  nm); The linear relationship of  $I_{317}/I_{380}$  with styrene concentration for UiO-66 (b) and Tb-UiO-66 (1:103) (c).

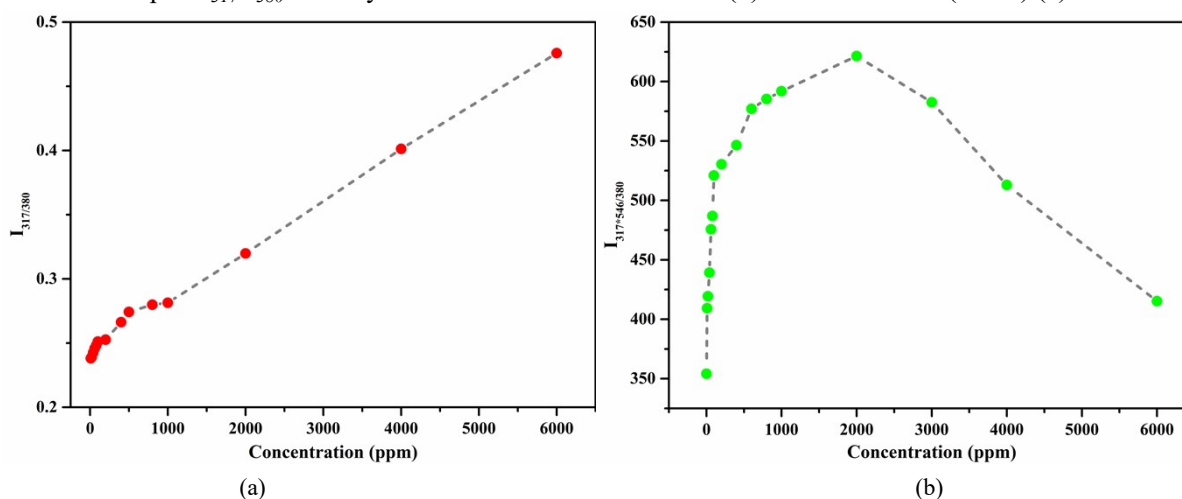

(a) (b)

Fig. S8 The trend diagram between EB concentration and relative fluorescence intensity of (a) UiO-66 and (b) Tb-UiO-66 (1:103).



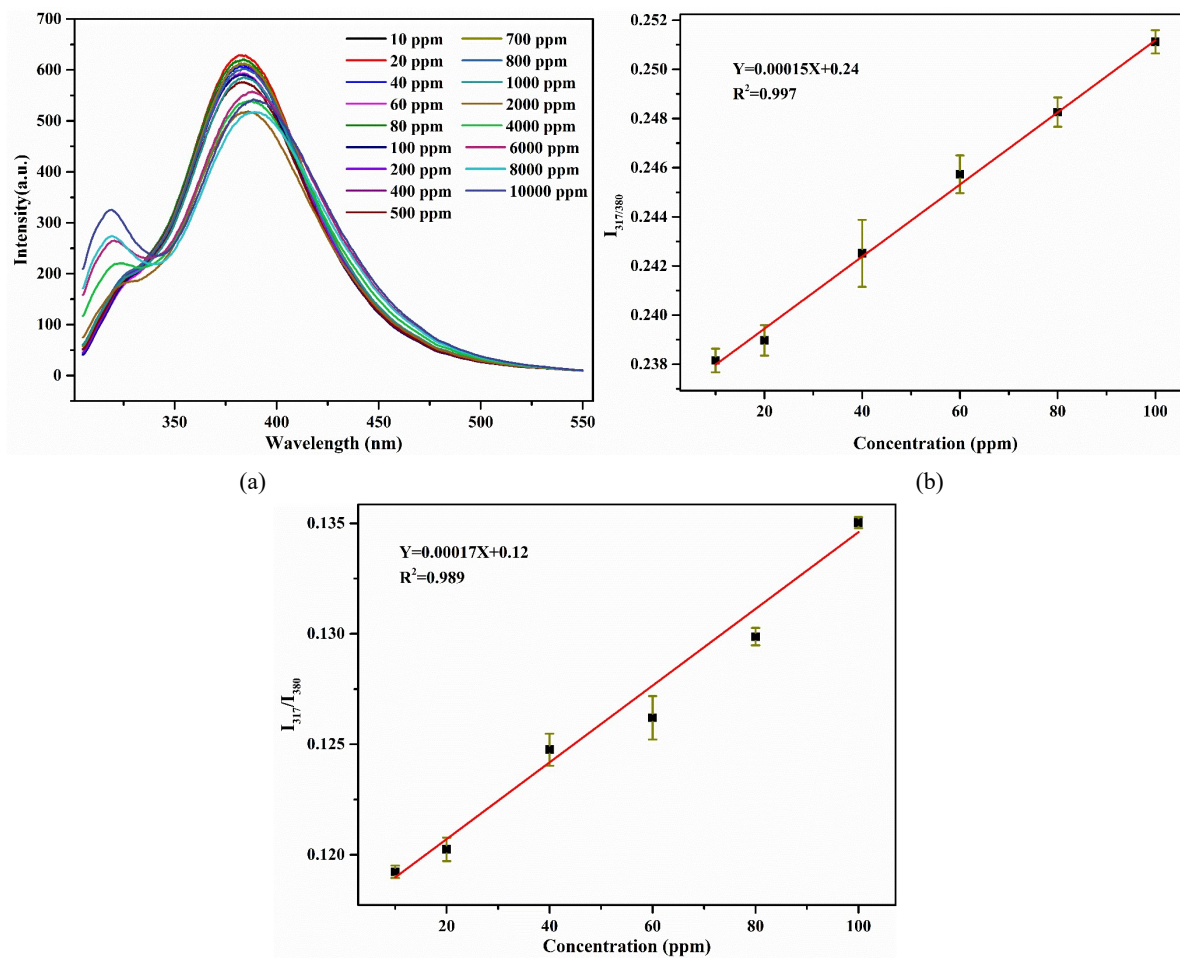

Fig. S9 Titration results of EB (a) fluorescence spectrum of UiO-66; The linear relationship of  $I_{317}/I_{380}$  with EB concentration for UiO-66 (b) and Tb-UiO-66 (1:103) (c).

Table S4. LMOFs used for the detection of styrene and EB.

| No. | materials                | medium used | sensor technique        | LOD       | VOC          | Ref. |
|-----|--------------------------|-------------|-------------------------|-----------|--------------|------|
| 1   | Tb-MOFs                  | methanol    | Fluorescence            | 0.0017 %  | styrene      | 1    |
| 2   | UiO-66-TBPE              | vapor       | Fluorescence            | 0.706 ppm | styrene      | 2    |
| 3   | ZIF-8/TiO <sub>2</sub>   | vapor       | charge coupled device   | 57 ppm    | styrene      | 3    |
| 4   | PhTES-TEOS films         | vapor       | FTIR absorption spectra | <100 ppm  | styrene      | 4    |
| 5   | NH <sub>2</sub> -MIL-88B | vapor       | photonic crystal sensor | 88 ppm    | ethylbenzene | 5    |

## 9. Sensing mechanisms

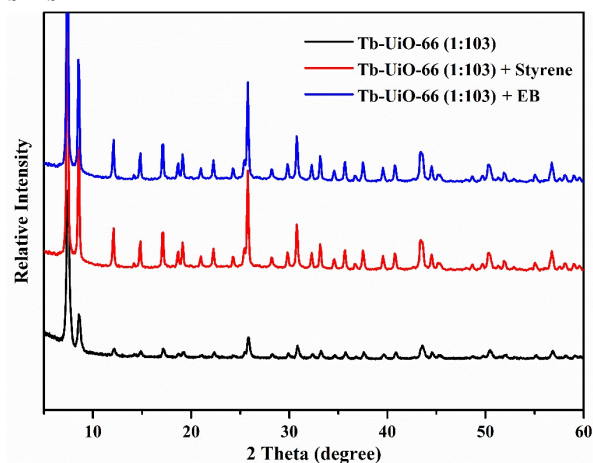

Fig. S10 PXRD patterns before and after adsorption of styrene and EB by Tb-UiO-66 (1:103).

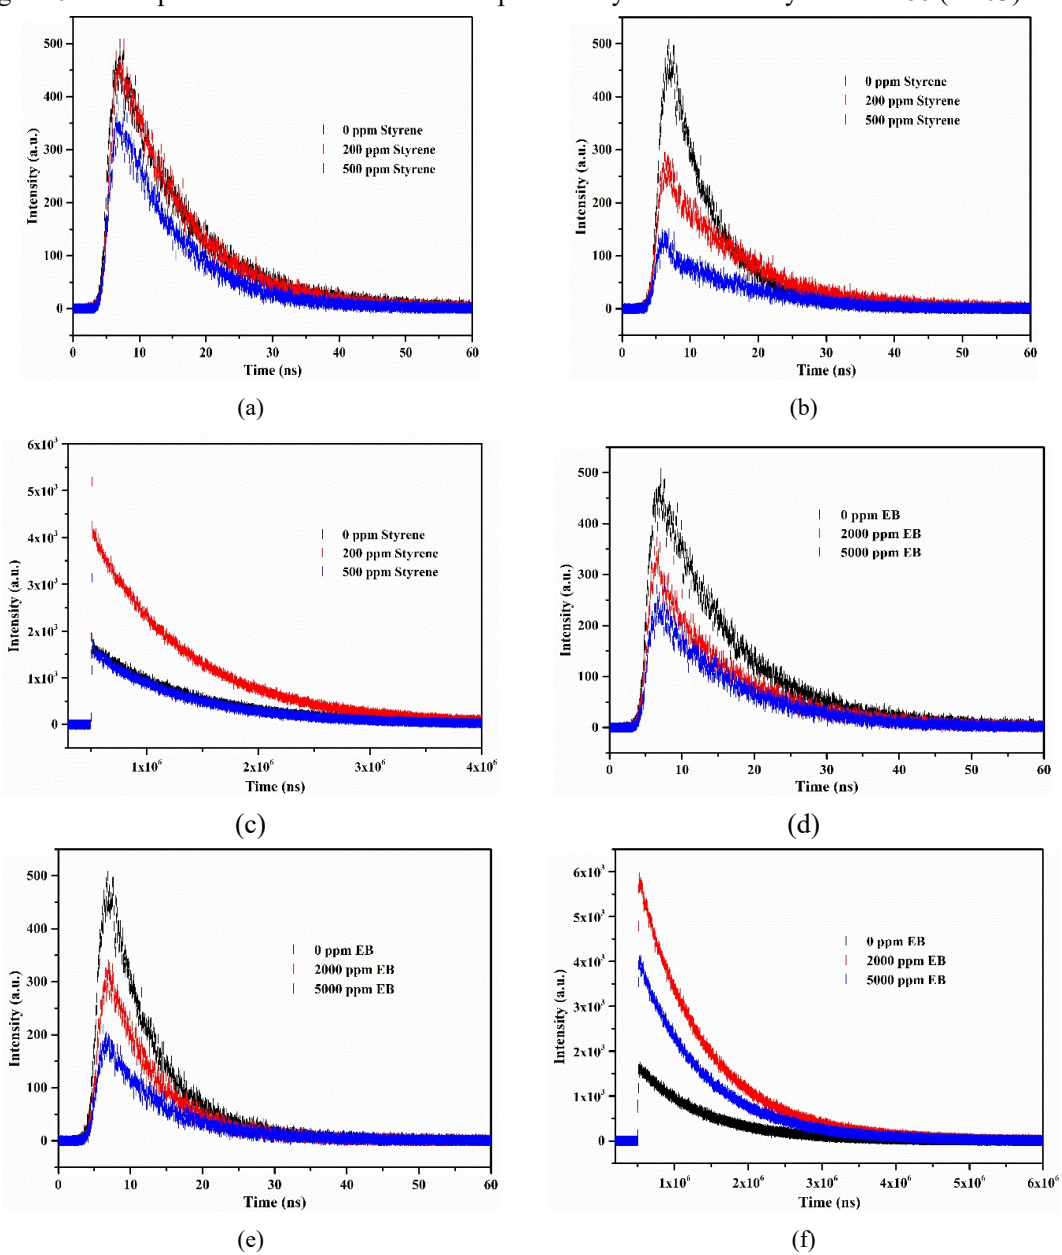

Fig. S11 Fluorescence lifetime of different styrene concentrations at different excitation

wavelengths (a) 317 nm; (b) 380 nm; (c) 546 nm. And fluorescence lifetime of different EB concentrations at different excitation wavelengths (d) 317 nm; (e) 380 nm; (f) 546 nm.

Table. S5 Fluorescence lifetime parameters of different styrene concentrations at different excitation wavelengths.

| Em (nm) | Concentration (ppm) | Fluorescence lifetime ( $\tau$ /ns) | Energy transfer efficiency ( $E$ ) | Pre-exponential factor ( $B_i$ /%) | $\chi^2$ |
|---------|---------------------|-------------------------------------|------------------------------------|------------------------------------|----------|
| 317     | 0                   | 10.2174                             |                                    | 461.332                            | 0.835    |
|         | 200                 | 9.65890                             | 5.47 %                             | 457.775                            | 0.834    |
|         | 500                 | 8.66000                             | 15.2 %                             | 347.628                            | 0.693    |
| 380     | 0                   | 6.64440                             |                                    | 478.035                            | 0.677    |
|         | 200                 | 10.6302                             | -60.0 %                            | 269.277                            | 0.846    |
|         | 500                 | 10.3353                             | -55.5 %                            | 110.241                            | 0.706    |
| 546     | 0                   | 915163                              |                                    | 1598.94                            | 0.975    |
|         | 200                 | 900328                              | 1.62 %                             | 4002.47                            | 1.31     |
|         | 500                 | 877557                              | 4.11 %                             | 1546.34                            | 1.08     |

Table. S6 Fluorescence lifetime parameters of different ethylbenzene concentrations at different excitation wavelengths.

| Em (nm) | Concentration (ppm) | Fluorescence lifetime ( $\tau$ /ns) | Energy transfer efficiency ( $E$ ) | Pre-exponential factor ( $B_i$ /%) | $\chi^2$ |
|---------|---------------------|-------------------------------------|------------------------------------|------------------------------------|----------|
| 317     | 0                   | 10.2174                             |                                    | 461.332                            | 0.835    |
|         | $2 \times 10^3$     | 10.2563                             | -0.381 %                           | 299.716                            | 0.822    |
|         | $5 \times 10^3$     | 10.3136                             | -0.942 %                           | 213.034                            | 0.719    |
| 380     | 0                   | 6.64440                             |                                    | 478.035                            | 0.677    |
|         | $2 \times 10^3$     | 6.94560                             | -4.53 %                            | 311.398                            | 0.624    |
|         | $5 \times 10^3$     | 8.06270                             | -21.3 %                            | 188.467                            | 0.736    |
| 546     | 0                   | 915163                              |                                    | 1598.94                            | 0.975    |
|         | $2 \times 10^3$     | 923918                              | -0.957 %                           | 5651.99                            | 1.384    |
|         | $5 \times 10^3$     | 919322                              | -0.454 %                           | 3802.81                            | 1.199    |

## References

- 1 L. Feng, C. Dong, M. Li, L. Li, X. Jiang, R. Gao, R. Wang, L. Zhang, Z. Ning, D. Gao and J. Bi, *J. Hazard. Mater.*, 2020, **388**, 121816.
- 2 F. Yang, J. Ma, Q. Zhu, Z. Ma and J. Wang, *ACS Appl. Mater. Interfaces*, 2022, **14**, 22510-22520.
- 3 O. Dalstein, D. R. Ceratti, C. Boissière, D. Grosso, A. Cattoni and M. Faustini, *Adv. Funct. Mater.*, 2016, **26**, 81-90.
- 4 F. Radica, S. Mura, D. Carboni, L. Malfatti, S. Garroni, S. Enzo, G. Della Ventura, G. Tranfo, A. Marcelli and P. Innocenzi, *Microporous Mesoporous Mater.*, 2020, **294**, 109877.
- 5 D. Kou, W. Ma, S. Zhang, R. Li and Y. Zhang, *ACS Appl. Mater. Interfaces*, 2020, **12**, 11955-11964.
